# Supplementary material for: Risk of adenocarcinoma in patients with a suspicious ground-glass opacity: a retrospective review
Source: PubMed Central journal article supplement — J Thorac Dis. 2022 Nov;14(11):4236–45. doi: 10.21037/jtd-22-583 (PMC9745528; doi:10.21037/jtd-22-583), 2022-11
Supplement: jtd-14-11-4236-dss.pdf [file jtd-14-11-4236-dss.pdf]

## Data Sharing Statement

|                     |                                                                                                                                                    |                                                                                                                                                     |
|---------------------|----------------------------------------------------------------------------------------------------------------------------------------------------|-----------------------------------------------------------------------------------------------------------------------------------------------------|
| <b>Article Info</b> | <a href="https://dx.doi.org/10.21037/jtd-22-583">https://dx.doi.org/10.21037/jtd-22-583</a>                                                        |                                                                                                                                                     |
| <b>Item</b>         | <b>Question</b>                                                                                                                                    | <b>Authors' Response<br/>(place "-" if not applicable)</b>                                                                                          |
| 1                   | Would you like to share data collected for your study to others?                                                                                   | Yes                                                                                                                                                 |
| 2                   | If not, would you like to share the reason for your decision?                                                                                      | -                                                                                                                                                   |
| 3                   | What data in particular will be shared?                                                                                                            | We are willing to share de-identified individual demographic, peri-operative, and pathologic data for patients in the study.                        |
| 4                   | Any other documents will be share? Such as study protocol, statistical analysis plan, informed consent form, clinical study report, analytic code. | No other relevant documents are available.                                                                                                          |
| 5                   | When will data availability begin?                                                                                                                 | Upon document publication.                                                                                                                          |
| 6                   | When will data availability end?                                                                                                                   | Two years after publication date, as we may seek to publish updated data as our clinical experience with this subject grows.                        |
| 7                   | To whom will you share the data?                                                                                                                   | Medical investigators and clinicians with expertise in lung cancer.                                                                                 |
| 8                   | For what type of analysis or purpose?                                                                                                              | For comparison of our findings in other settings that treat similar conditions.                                                                     |
| 9                   | How or where can the data/documents be obtained?                                                                                                   | Investigators can request data sharing by contacting Dr. Mark Berry via email ( <a href="mailto:berry037@stanford.edu">berry037@stanford.edu</a> ). |
| 10                  | Any other restrictions?                                                                                                                            | We will consider all requests individually to ensure the data will be used ethically and sharing is approved by our home institution                |
